# Supplementary material for: TonEBP suppresses adipogenesis and insulin sensitivity by blocking epigenetic transition of PPARγ2
Source: Sci Rep. 2015 Jun 4;5:10937. doi: 10.1038/srep10937 (PMC4455245; doi:10.1038/srep10937)
Supplement: Supplementary Information [file srep10937-s1.pdf]

**TonEBP suppresses adipogenesis and insulin sensitivity by blocking epigenetic transition of PPAR $\gamma$ 2**

Jun Ho Lee, Hwan Hee Lee, Byeong Jin Ye, Whaseon Lee-Kwon, Soo Youn Choi<sup>\*</sup>, and Hyug Moo Kwon<sup>\*</sup>.

School of Life Sciences, Ulsan National Institute of Science and Technology, Ulsan, Republic of Korea

<sup>\*</sup> Address correspondence to H.M. Kwon ([hmkwon@unist.ac.kr](mailto:hmkwon@unist.ac.kr)) or S.Y. Choi ([sychoi@unist.ac.kr](mailto:sychoi@unist.ac.kr)).

Building 104, Room 709

School of Life Sciences

Eoyang-eup, Ulju-gun

Ulsan 689-798

Republic of Korea

Tel: +82-217-52-2633

## Supplementary Figures

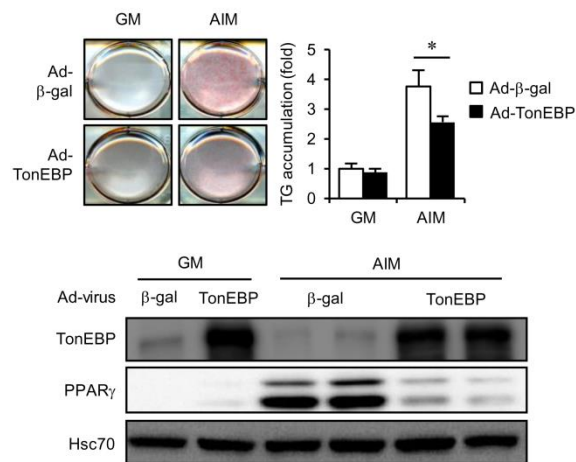

Supplementary Figure S1 (related to Figure 1). TonEBP overexpression suppresses adipogenesis and PPAR $\gamma$  expression.

3T3-L1 cells were infected with adenovirus expressing TonEBP or  $\beta$ -galactosidase ( $\beta$ -gal) as indicated, followed by a 6 day culture in AIM. The cells were immunoblotted for TonEBP and Hsc70, and stained with Oil-Red-O and the stain was extracted and measured to assess intracellular TG. Relative intracellular TG was represented as Mean + SD,  $n = 4$ . \* $p$  < 0.05.

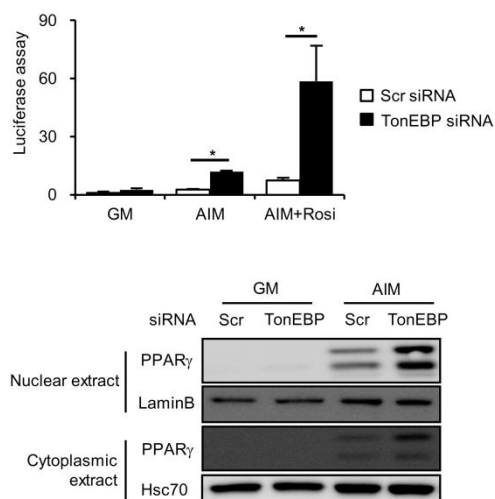

Supplementary Figure S2 (Related Figure 2). TonEBP suppresses PPAR $\gamma$  transcription activity.

3T3-L1 transfected with scrambled (Scr, open bars) or TonEBP-targeted siRNA (filled bars) were cultured for 4 days in GM or AIM without or with rosiglitazone. The cells were transfected with PPAR-responsive element (PPRE) reporter plasmid and luciferase activity was measured. The cells were fractionated into nuclear and cytoplasmic fractions and immunoblotted for PPAR $\gamma$ , lamin B and Hsc70.

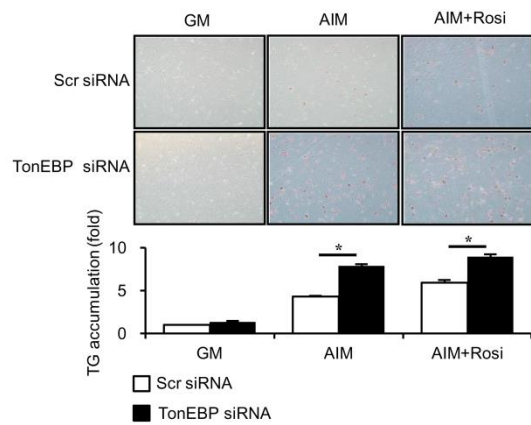

Supplementary Figure S3 (Related to Figure 1 and Figure 2). TonEBP suppresses adipogenesis from human bone marrow-derived mesenchymal stem cells.

Cells were transfected with scrambled (open bars) or TonEBP targeted siRNA (filled bars) and cultured in AIM as described in Fig 1. Mean + SD,  $n = 4$ . \* $p < 0.05$

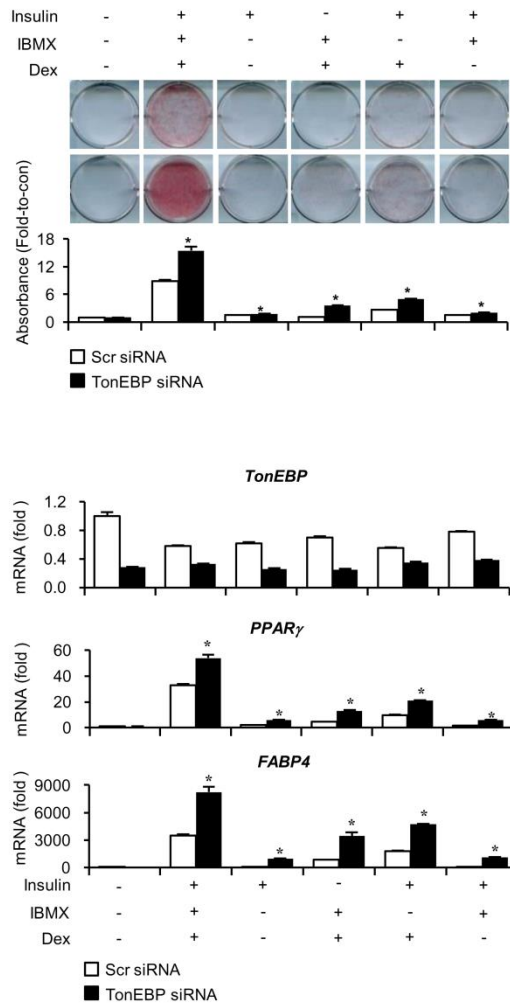

Supplementary Figure S4 (Related to Figure 4). TonEBP suppresses adipocytes differentiation independent of insulin, IBMX, and dexamethasone (Dex).

3T3-L1 transfected with scrambled or TonEBP-targeted siRNA were cultured for 6 days in AIM or various AIM without insulin, IBMX, or Dex as indicated. Images of Oil-Red-O stained cells and spectrophotometric quantification are shown. Quantitative RT-PCR analyses of mRNA for TonEBP, PPAR $\gamma$ , and FABP4 are shown. Mean + SD, n = 4. \* $p$  < 0.05 vs. corresponding scr siRNA.

## Supplementary Table

**Supplementary Table S1.**

|                 |                                                                      |
|-----------------|----------------------------------------------------------------------|
| TonEBP          | 5'-AAGCAGCCACCACCAAACATGA-3' and 5'-AAATTGCATGGGCTGCTGCT-3'          |
| C/EBP $\beta$   | 5'-AGCTGAGCGACGAGTACAAGAT-3' and 5'-TTGAACAAGTTCCGCAGGGT-3'          |
| C/EBP $\alpha$  | 5'-GTCACCTGGTCAACTCCAGCAC-3' and 5'-CAAGAACAGCAACGAGTACCG-3'         |
| PPAR $\gamma$ 1 | 5'-AGGAGAAGTCACACTCTGACAGGA-3' and 5'-TCAGTGTTTCACCGCTTCTT-3'        |
| PPAR $\gamma$ 2 | 5'-TTCGCTGATGCACTGCCATGA-3' and 5'-AAGGAATGCGAGTGGTCTTCCA-3'         |
| PPAR $\gamma$   | 5'-TCTTAACTGCCGGATCCACAA-3' and 5'-GCCCAAACCTGATGGCATT-3'            |
| FABP4           | 5'-TGGAAGCTTGTCTCCAGTGA-3' and 5'-AATCCCCATTTACGCTGATG-3'            |
| SREBP-1c        | 5'-GCCGTGGTGAGAAGCGCACAGCCC-3' and 5'-CAAGACAGCAGATTTATTCAGCTTTGC-3' |
| SCD1            | 5'-TTCTTGCGATACACTCTGGTGC-3' and 5'-CGGGATTGAATGTTCTTGTCGT-3'        |
| ACC             | 5'-CTGACGTATACTGAACTGGTGTGGATG-3' and 5'-TTCCAGGCTACCATGCCAATCTC-3'  |
| Adiponectin     | 5'-TGGAATGACAGGAGCTGAAGG3' and 5'-ACACTGAACGCTGAGCGATACACA-3'        |
| Glut4           | 5'-CAATGGTTGGGAAGGAAAAGGGCTA-3' and 5'-GTAGGCGCCAATGAGGAACCGTC-3'    |
| TNF $\alpha$    | 5'-TGGGACAGTGACCTGGACTGT-3' and 5'-TTCGAAAGCCCATTGAGT-3'             |
| Leptin          | 5'-GGGCTTCACCCCATTCTGA-3' and 5'-TGGCTATCTGCAGCACATTTTG-3'           |
| Resistin        | 5'-TCGTGGGACATTCTGTAAGA-3' and 5'-GGGCTGCTGTCCAGTCTATCC-3'           |
| MCP-1           | 5'-AACTGCATCTGCCCTAAGGT-3' and 5'-AGTGCTTGAGGTGGTTGTGGAA-3'          |
